# Supplementary material
Source: PubMed Central journal article supplement (PMC5340296)
Supplement: NIHMS852626-supplement-Supplemental_files.pdf [file NIHMS852626-supplement-Supplemental_files.pdf]

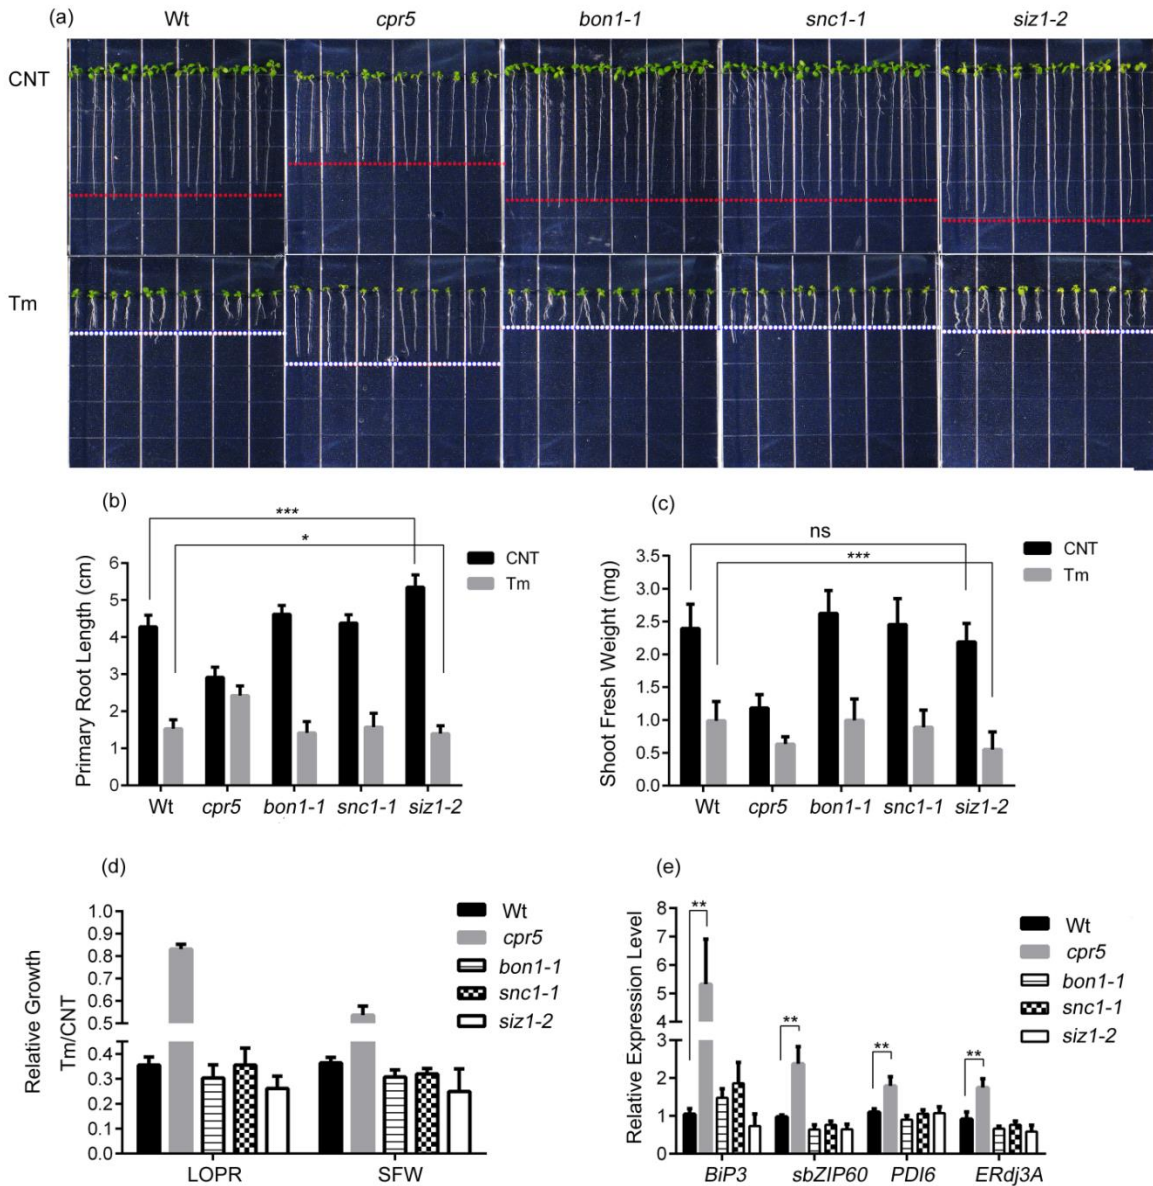

**Figure S1. High SA content mutants do not show the ER stress tolerance phenotype of *cpr5*.**

**(a)** The indicated genotypes were germinated on 1/2 LS medium containing 0.0005% DMSO (Control, CNT) or 50 ng/mL Tm for 12 days vertically. **(b)** Measurement of primary root length (cm). **(c)** Quantification of shoot fresh weight (mg). **(d)** The relative growth rate of seedlings as indicated in (a).  $n=24$  for each genotype. **(e)** Relative expression of UPR marker genes *BiP3*, *PDI*, *ERdj3A* and spliced bZIP60 (*sbZIP60*) in Wt and high SA-content mutants estimated by qRT-PCR analyses in 12-day-old seedlings under normal growth condition. The relative gene expression represents the expression level of each gene in the mutants divided by that in Wt, both of which were normalized to the expression of UBQ10. The values shown were relative to Wt which was set to 1. Error bars represent SD from three biological replicates. \*\* $P < 0.001$ . \* $P < 0.05$ ; \*\* $P < 0.001$ ; \*\*\* $P < 0.0001$ ; ns: not significant.

(a)

MEALLPPSPPEPQNQITNPANSKPNHQSGDVHKDETM~~MM~~KKKKDTNPSNLEKRKLGKKKKEIMDNDEASSYCSTSS  
TSNSNSTKR~~VTRV~~VHRLRNPMLGMARRSVGERQAEKLA~~KPLG~~FLAFAFANMVIARKNAAGQNVYVDDLVEIFATLV  
EESLANVYGNKLG~~SFATN~~FEQTFSS~~TLKILKLT~~NECANPHQSNNNDGGSCNLDRSTIDGCSDELFERETSSATSAYEVM  
QGSATATSLMNELALFEETLQLSCVPPRSSAMALTTDERFLKEQTRANDLKTVEIGLQIRELRCKETALGLKFESNNLGKA  
ALELDVSKAA~~FRAEKFKTE~~LEDTRKEEMVTRIMDWLLVSVFSMLAS~~MVLGV~~YNFSIKRIEDATSVCDQSEEKSSSWWVP  
KQVSSINSGFNTFICRVRVWVQIFFGVLMII~~VFTYFL~~NKRSSGKQTMPISFIVLFLGIFCGVSGKLCVDTLGGDGKWLIV  
WEVFCLLQFVANVFTLALYGLMFGPINVTQETRSNRCNSMFPYWARRSVVYVILFVLPVINGLLPFATFGWRDFAM  
YHLHGSDYA

(b)

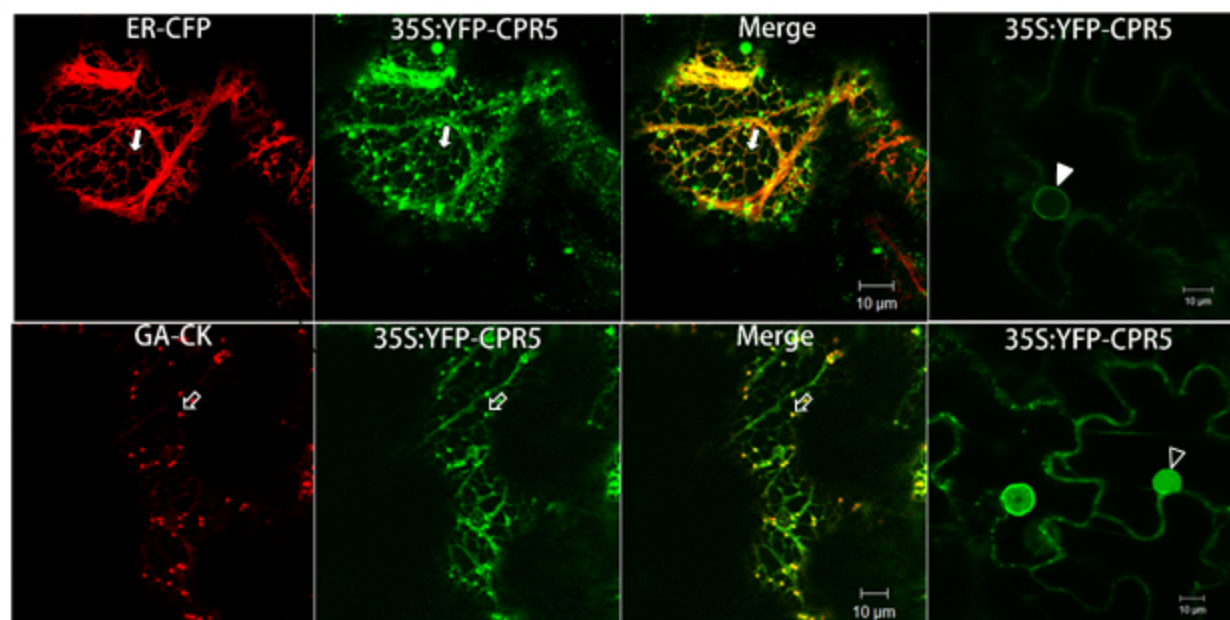

(c)

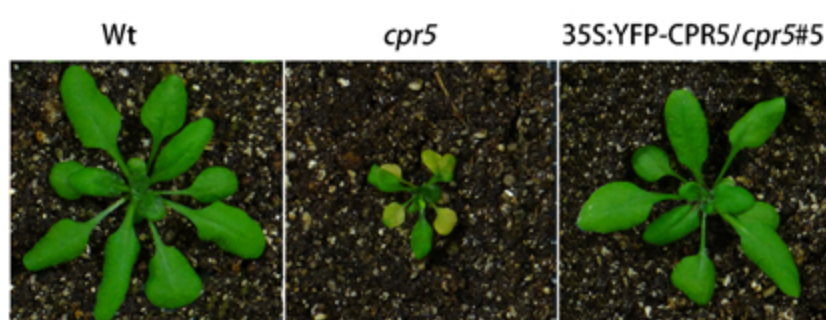

(d)

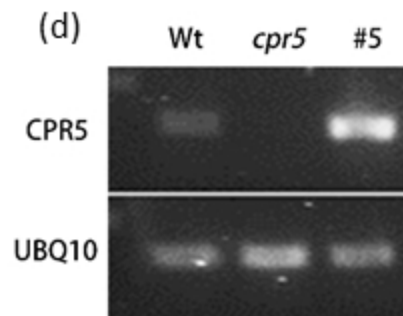

## Supporting Information Legends

### **Figure S1. High SA content mutants do not show the ER stress tolerance phenotype of *cpr5*.**

**(a)** The indicated genotypes were germinated on 1/2 LS medium containing 0.0005% DMSO (Control, CNT) or 50 ng/mL Tm for 12 days vertically.

**(b)** Measurement of primary root length (cm).

**(c)** Quantification of shoot fresh weight (mg).

**(d)** The relative growth rate of seedlings as indicated in (a). n=24 for each genotype.

**(e)** Relative expression of UPR marker genes *BiP3*, *PDI*, *ERdj3A* and spliced bZIP60 (*sbZIP60*) in Wt and high SA-content mutants estimated by qRT-PCR analyses in 12-day-old seedlings under normal growth condition. The relative gene expression represents the expression level of each gene in the mutants divided by that in Wt, both of which were normalized to the expression of UBQ10. The values shown were relative to Wt which was set to 1. Error bars represent SD from three biological replicates. \*\*P<0.001.

### **Figure S2. The subcellular localization of CPR5 in the ER, Golgi, and nucleoplasm is suggestive of activation of CPR5 by proteolysis.**

**(a)** Amino acid sequence of CPR5. The blue characters indicate a putative bipartite nuclear-localization signal. The 5 predicted transmembrane domains are

underlined. The red character (W) indicates the position of the point mutation in the *cpr5* allele used in this work (Trp477stop).

**(b)** Confocal analyses of YFP-CPR5 in tobacco leaf epidermal cells expressing either an ER marker, ER-CFP, or a Golgi marker, GA-CK. As supported by colocalization of the punctate structures labelled by YFP-CPR5, CPR5 is localized at the Golgi (hollow arrow) in addition to the ER localization. We have also verified that in some cells YFP-CPR5 is at the nuclear envelope (top right corner image, solid arrowhead) and in the nucleoplasm (bottom right corner image, hollow arrowhead).

**(c)** Complementation of *cpr5* by 35S:YFP-CPR5. Wt, *cpr5*, 35S:YFP-CPR5/*cpr5*#5 plants were grown on the soil for 4 weeks. The YFP-CPR5 fusion complements the *cpr5* phenotype.

**(d)** Semi-quantitative RT-PCR analyses of *CPR5* and *UBQ10* transcript in Wt, *cpr5* and 35S:YFP-CPR5/*cpr5*#5 show that YFP-CPR5 is expressed at higher levels compared to Wt.

**Figure S3. Proposed working model of roles of CPR5 in growth-ER stress defense tradeoff through SA and UPR.**

**(a)** CPR5 supports in growth in physiological conditions as well as under ER-stress inducing conditions by antagonizing SA which harnesses the UPR channels to repress growth. Therefore, in the balance of growth-defense tradeoffs **(b)**, successful allocation of the plant's resources to either growth or defense for survival depends on opposite roles of CPR5 and SA.

**Table S1. Primers list.**

**Table S1. Primers list.**

| Primers            | Sequence (5'–3')                | Gene      | Purpose                             |
|--------------------|---------------------------------|-----------|-------------------------------------|
| CS3770 WT F        | TGGCAAACCTCTGGCTAATAGTcTg       | At5g64930 | Genotyping <i>cpr5-2</i> and RT-PCR |
| CS3770 Mutation F  | TGGCAAACCTCTGGCTAATAGTcTa       | At5g64930 | Genotyping <i>cpr5-2</i>            |
| CS3770 R           | TCAAGCATAGTCAGACCCACCAT         | At5g64930 | Genotyping <i>cpr5-2</i> and RT-PCR |
| WiscDsLox420D09 RP | TATCTCCGATCCATCGTTGAC           | At2g17520 | genotyping <i>aire1a</i>            |
| WiscDsLox420D09 LP | CAAAATCTTCAGTGCTAGCGG           | At2g17520 | genotyping <i>aire1a</i>            |
| WiscDsLox LB       | AACGTCCGCAATGTGTTATTAAGT<br>TG  |           | genotyping <i>aire1a</i>            |
| SAIL_238_F07 RP    | GAAGGAAAACGGACATCCTTC           | At5g24360 | genotyping <i>aire1b-1</i>          |
| SAIL_238_F07 LP    | CCTCTCGAACCTTCAGGTAC            | At5g24360 | genotyping <i>aire1b-1</i>          |
| SAIL LB            | TCATAACCAATCTCGATACAC           |           | genotyping <i>aire1b-1</i>          |
| SALK_050203 RP     | CACAGCATCATCGTCTCCTTC           | At1g42990 | genotyping <i>bzip60</i>            |
| SALK_050203 LB     | GGAAGAAAAGTCCTCTCGGAG           | At1g42990 | genotyping <i>bzip60</i>            |
| SALK_132285 RP     | TATCCCCTAACAGGATACGGC           | At3g10800 | genotyping <i>bzip28</i>            |
| SALK_132285 LP     | TTTATCATCATTGTTGGTCGCC          | At3g10800 | genotyping <i>bzip28</i>            |
| SALK_LB            | ATTTTGCCGATTTGGAAC              |           | genotyping SALK lines               |
| <i>sid2-2</i> F    | TTCAACCACCTGGTGAC               | At1g74710 | genotyping <i>sid2-2</i>            |
| <i>sid2-2</i> R    | TGTTGCACTCTTGCAAGC              | At1g74710 | genotyping <i>sid2-2</i>            |
| UBQ10-qP For       | GGCCTTGATAATCCCTGATGAA<br>TAAG  | At4g05320 | qRT-PCR                             |
| UBQ10-qP Rev       | AAAGAGATAACAGGAACGGAAC<br>ATAGT | At4g05320 | qRT-PCR                             |
| BiP3-qP For        | CGAAACGTCTGATTGGAAGAA           | At1g09080 | qRT-PCR                             |
| BiP3-qP Rev        | GGCTTCCCATCTTTGTTTAC            | At1g09080 | qRT-PCR                             |
| AtERdi3A-qP For    | CCCACCGCCCATATTTTG              | AT3G0890  | qRT-PCR                             |

| <b>Primers</b>  | <b>Sequence (5'–3')</b>            | <b>Gene</b> | <b>Purpose</b>                   |
|-----------------|------------------------------------|-------------|----------------------------------|
| AtERdj3A-qP Rev | TGAAAGCGAAGAGCGTTGATC              | AT3G0890    | qRT-PCR                          |
| PDI6-qP For     | CGAAGTGGCTTTGTCATTCCA              | At1g77510   | qRT-PCR                          |
| PDI6-qP Rev     | GCGGTTGCGTCCAATTTT                 | At1g77510   | qRT-PCR                          |
| sbZIP60-qP For  | GGAGACGATGATGCTGTGGCT              | At1g42990   | qRT-PCR                          |
| sbZIP60-qP Rev  | CAGGGAACCCAACAGCAGACT              | At1g42990   | qRT-PCR                          |
| UBQ10 For       | TCAATTCTCTCTACCGTGATCAAG<br>ATGCA  | At4g05320   | RT-PCR                           |
| UBQ10 Rev       | GGTGTGAGAACTCTCCACCTCAA<br>GAGTA   | At4g05320   | RT-PCR                           |
| CPR5 F          | ATGGAAGCCCTCCTCCTCCCTCC<br>T       | At5g64930   | 35S:YFP-CPR5/CPR5ΔTMD<br>and Y2H |
| CPR5 R          | TCAAGCATAGTCAGACCCACCAT            | At5g64930   | 35S:YFP-CPR5                     |
| CPR5ΔTMD R      | TCATGTGACCATCTCTTCTTTTCT<br>TGTATC | At5g64930   | 35S:YFP-CPR5ΔTMD and<br>Y2H      |
| sbZIP60 F       | ATGGCGGAGGAATTTGGAA                | At1g42990   | FRET                             |
| sbZIP60 R       | TCACGCCGCAAGGGTTAAGATT             | At1g42990   | FRET                             |
| bZIP28ΔTMD F    | ATGACGGAATCAACATCCGTGGT<br>TG      | At3g10800   | FRET                             |
| bZIP28ΔTMD R    | TCACTTCTTGAGCTTACTTTTACC<br>CTCA   | At3g10800   | FRET                             |
| sbZIP60ΔAD F    | CCAACTAGCGATTCTGGCTC               | At1g42990   | Y2H                              |
| <b>Primers</b>  | <b>Sequence (5'–3')</b>            | <b>Gene</b> | <b>Purpose</b>                   |
| sbZIP60ΔAD R    | TCACGCCGCAAGGGTTAAGAT              | At1g42990   | Y2H                              |
| bZIP28ΔTMDΔAD F | gaCGCATCATCCTCCCCTGAATCA           | At3g10800   | Y2H                              |
| bZIP28ΔTMDΔAD R | TCACTTCTTGAGCTTACTTTTACC<br>C      | At3g10800   | Y2H                              |
